# Supplementary material for: A conserved histidine in switch-II of EF-G moderates release of inorganic phosphate
Source: PubMed Central journal article supplement (PMC4532990; doi:10.1038/srep12970), 2015-08-12
Supplement: srep12970-s1.pdf [file srep12970-s1.pdf]

## Supplementary Information

### A conserved histidine in switch-II of EF-G moderates release of inorganic phosphate

Ravi Kiran Koripella, Mikael Holm, Daniel Dourado, Chandra Sekhar Mandava, Samuel Flores and Suparna Sanyal\*

Department of Cell and Molecular Biology, Uppsala University, Box-596, BMC, 75124, Uppsala, Sweden

\*Correspondence: [suparna.sanyal@icm.uu.se](mailto:suparna.sanyal@icm.uu.se), 0046-18-471 4220

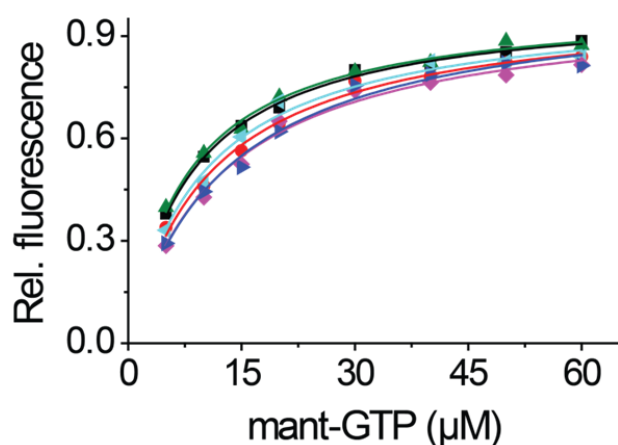

**Figure S1. Affinity of EF-G for mant-GTP.** The affinity of various EF-G variants WT (black), F94L (cyan), H91A (red), H91E (green), H91Q (magenta) and H91R (blue) for mant-GTP was measured by titrating mant-GTP against a fixed concentration of EF-G. The relative fluorescence increase from saturation binding of EF-G was plotted against concentrations of mant-GTP. The data points were fitted using a hyperbolic equation to estimate the  $K_D$  values.

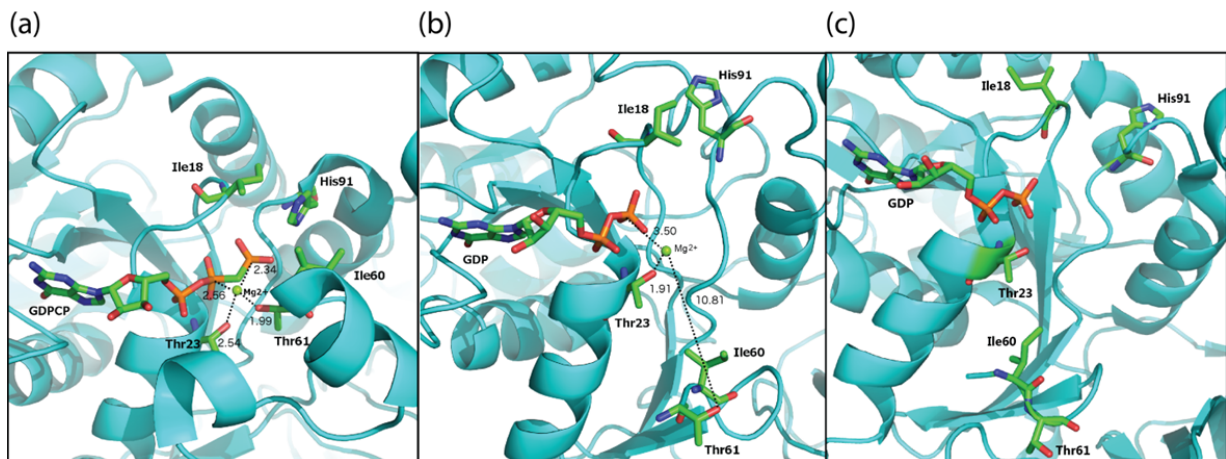

**Figure S2. Position of the Mg<sup>2+</sup> ion in the crystal structures of EF-G on the ribosome.** (a) with GDPCP (PDB: 4CR1)<sup>1</sup>, (b-c) with GDP (and fusidic acid); PDBs 2WRI (b)<sup>2</sup> and 4KDA (c)<sup>3</sup>, respectively. The structure in (c) lacks the Mg<sup>2+</sup> ion. Other important residues and intramolecular interactions are shown with labels or dotted lines.

## References

1. Chen, Y., Feng, S., Kumar, V., Ero, R. & Gao, Y.G. Structure of EF-G-ribosome complex in a pretranslocation state. *Nat Struct Mol Biol* **20**, 1077-84 (2013).
2. Gao, Y.G. et al. The structure of the ribosome with elongation factor G trapped in the posttranslocational state. *Science* **326**, 694-9 (2009).
3. Zhou, J., Lancaster, L., Donohue, J.P. & Noller, H.F. Crystal structures of EF-G-ribosome complexes trapped in intermediate states of translocation. *Science* **340**, 1236086 (2013).
